# Supplementary material for: Palladium-Catalyzed Arylations towards 3,6-Diaryl-1,3a,6a-triazapentalenes and Evaluation of Their Fluorescence Properties
Source: MDPI journal article supplement (doi:10.3390/molecules29102229), 2024-05-09
Supplement: s1 [file s1]

# Palladium-Catalyzed Arylations Towards 3,6-Diaryl-1,3a,6a-triazapentalenes and Evaluation of Their Fluorescence Properties

Yingchun Wang,<sup>a</sup> Tomas Opsomer,<sup>\*a</sup> Flip de Jong,<sup>b</sup> Davy Verhaeghe,<sup>b</sup> Maarten Mulier,<sup>a</sup> Luc Van Meervelt,<sup>c</sup> Mark Van der Auweraer,<sup>b</sup> Wim Dehaen<sup>\*a</sup>

<sup>a</sup>Sustainable Chemistry for Metals and Molecules, Department of Chemistry, KU Leuven, Celestijnenlaan 200F, 3001 Leuven, Belgium.

<sup>b</sup>Molecular Imaging and Photonics, Department of Chemistry, KU Leuven, Celestijnenlaan 200F, 3001 Leuven, Belgium.

<sup>c</sup>Biochemistry, Molecular and Structural Biology, Department of Chemistry, KU Leuven, Celestijnenlaan 200F, 3001 Leuven, Belgium

\*Email: [tomas.opsomer@sckcen.be](mailto:tomas.opsomer@sckcen.be), [wim.dehaen@kuleuven.be](mailto:wim.dehaen@kuleuven.be)

## Contents

|                                         |    |
|-----------------------------------------|----|
| 1D NMR spectra .....                    | 2  |
| 2D NMR spectra .....                    | 10 |
| Crystal structure of <b>TAP4a</b> ..... | 12 |

# 1D NMR spectra

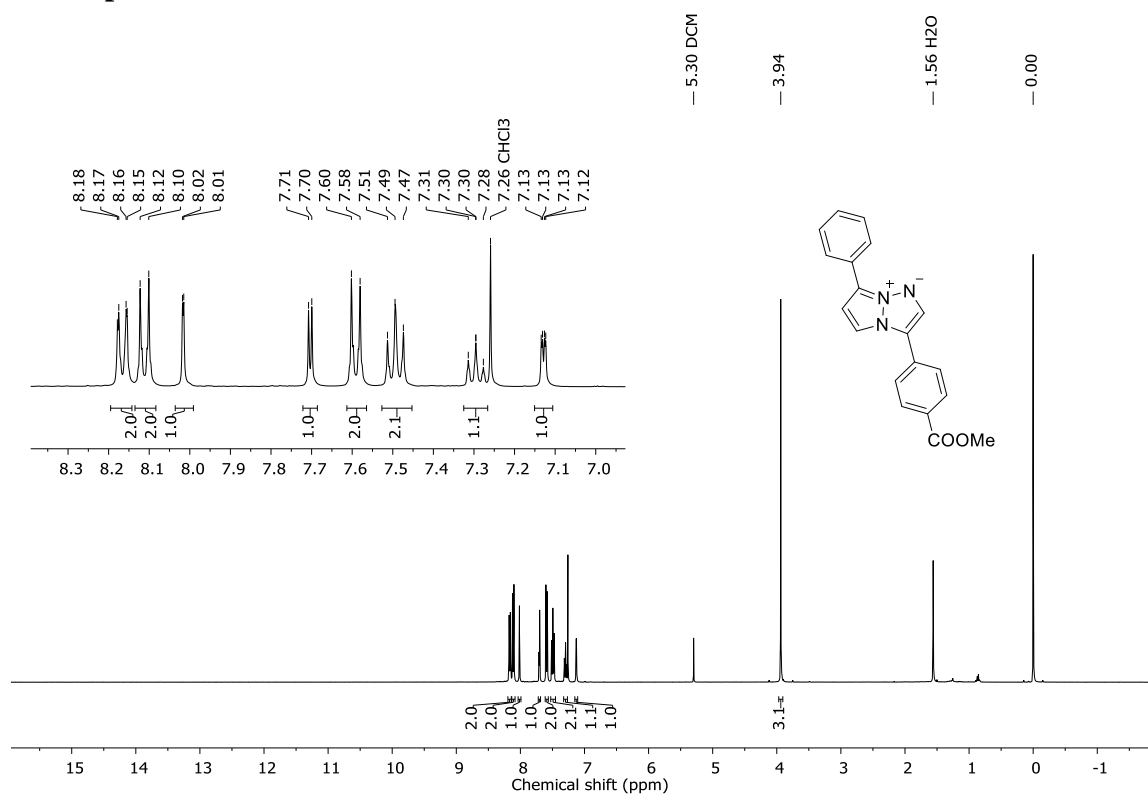

Figure S1. **TAP4a**, <sup>1</sup>H, 400 MHz, CDCl<sub>3</sub>

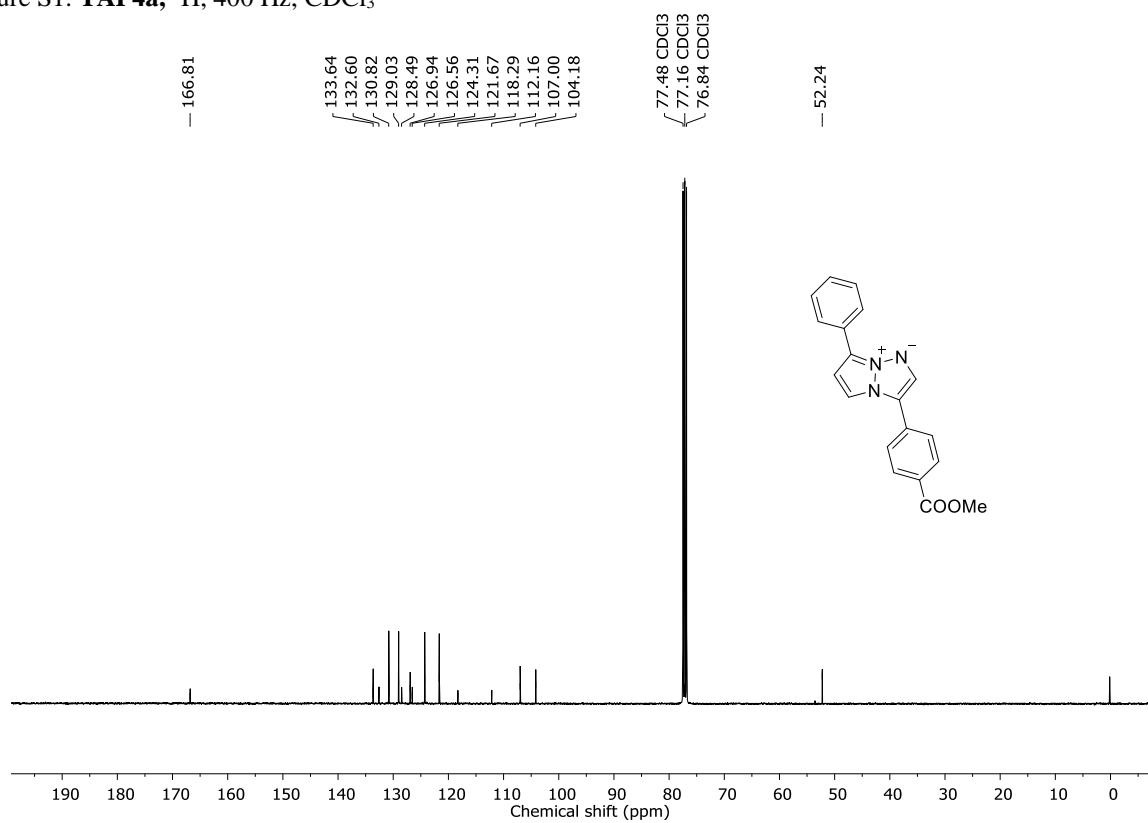

Figure S2. **TAP4a**, <sup>13</sup>C{<sup>1</sup>H}, 101 MHz, CDCl<sub>3</sub>

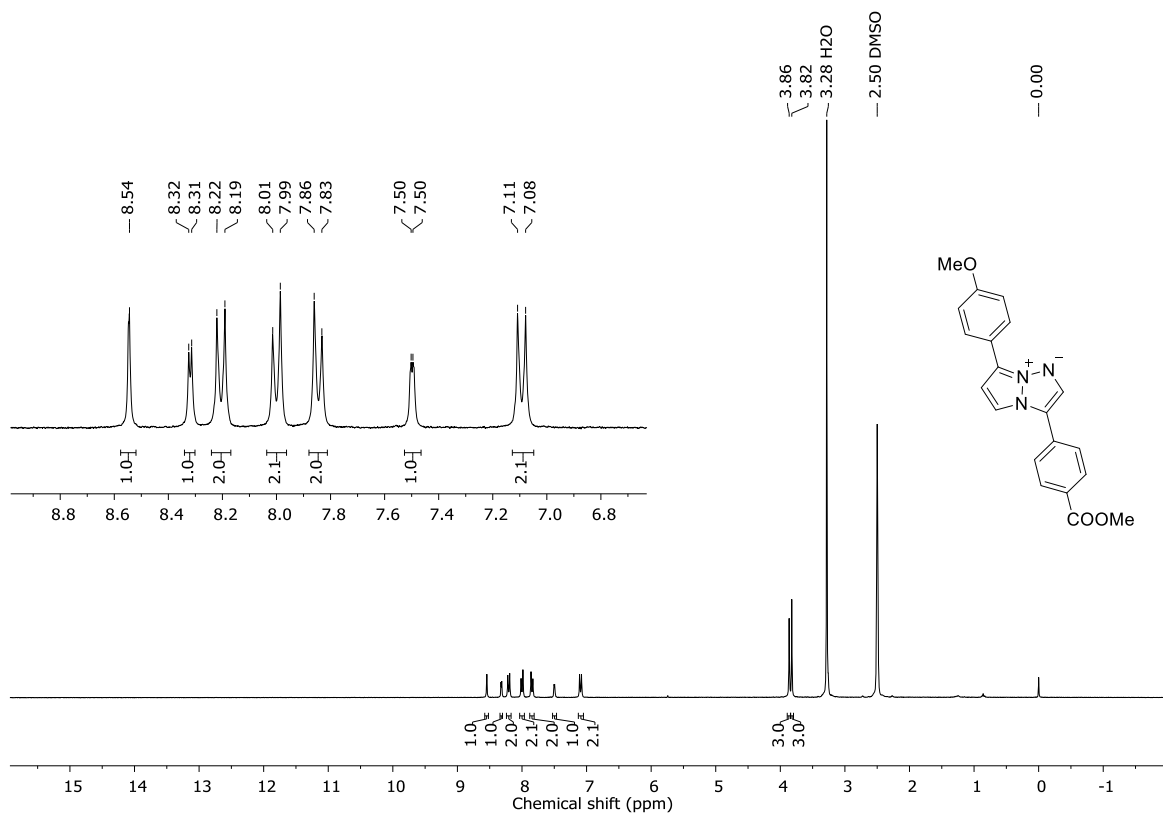

Figure S3. TAP4b,  $^1\text{H}$ , 300 Hz,  $\text{DMSO}-d_6$

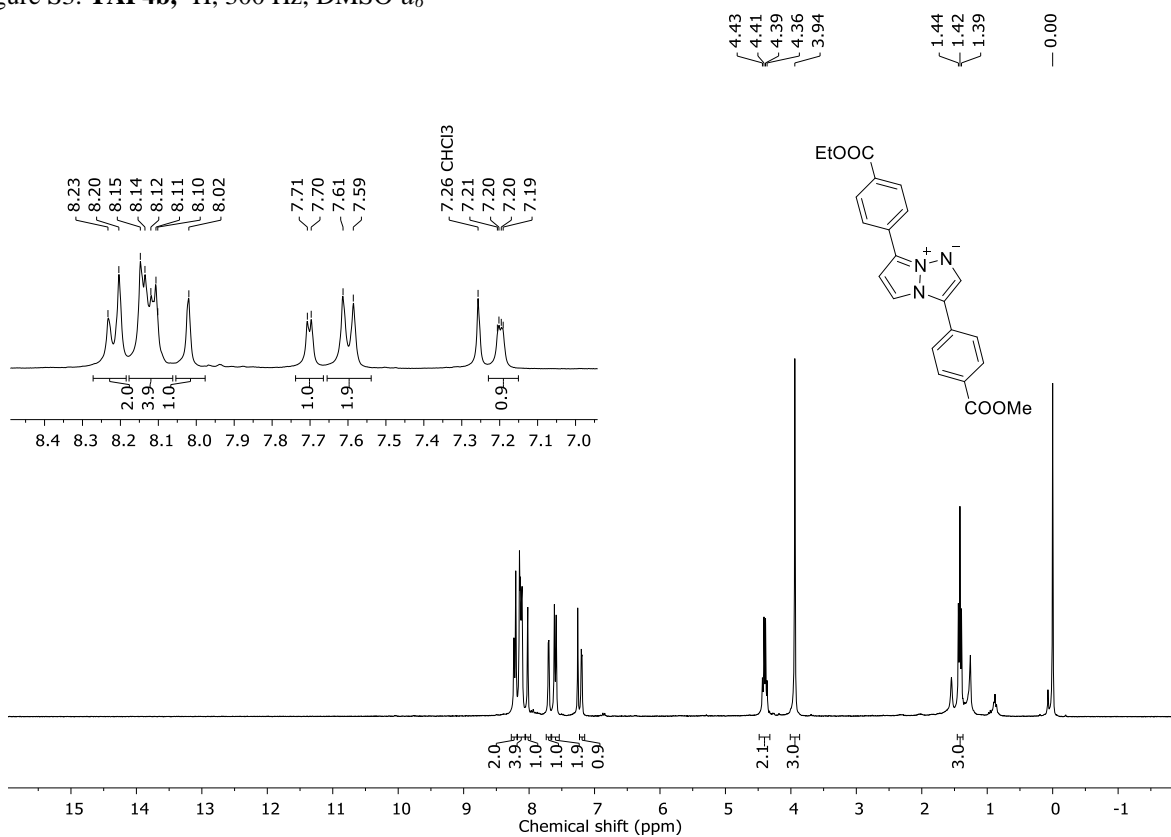

Figure S4. TAP4c,  $^1\text{H}$ , 300 MHz,  $\text{CDCl}_3$

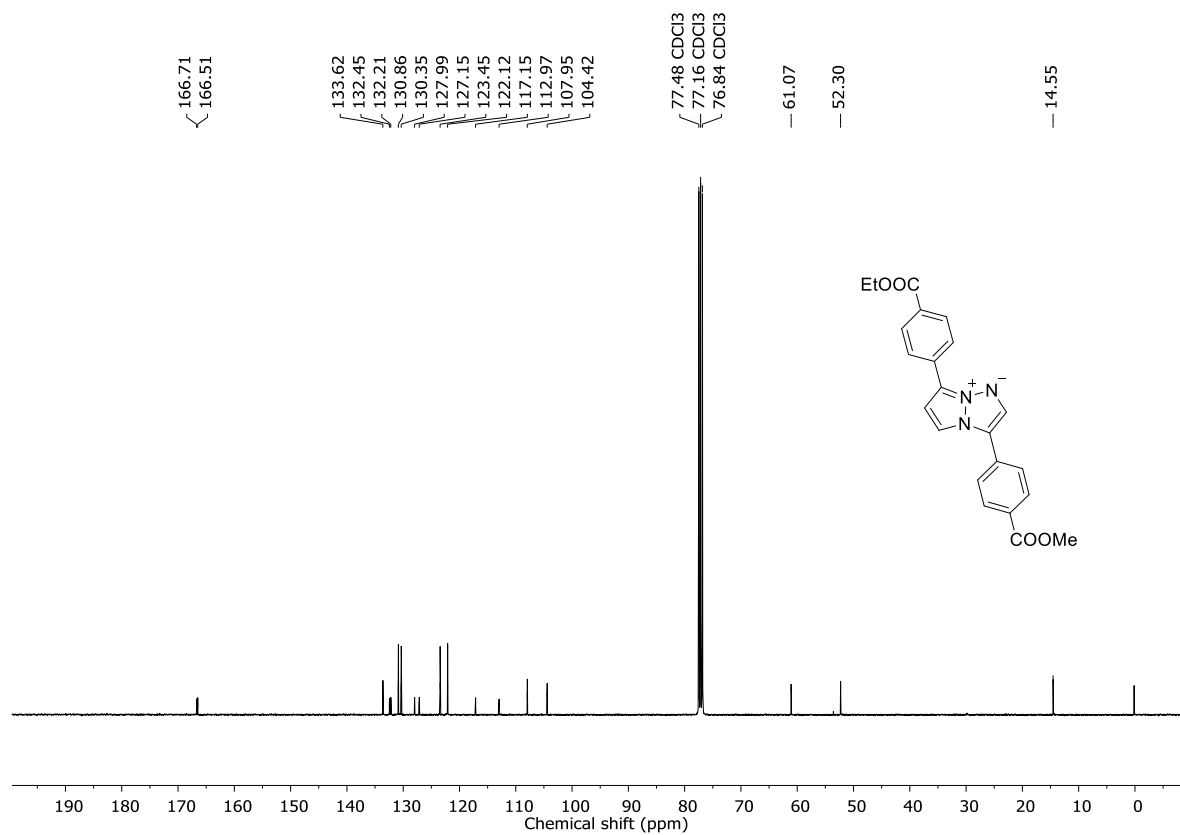

Figure S5. TAP4c,  $^{13}\text{C}\{^1\text{H}\}$ , 101 MHz, CDCl<sub>3</sub>

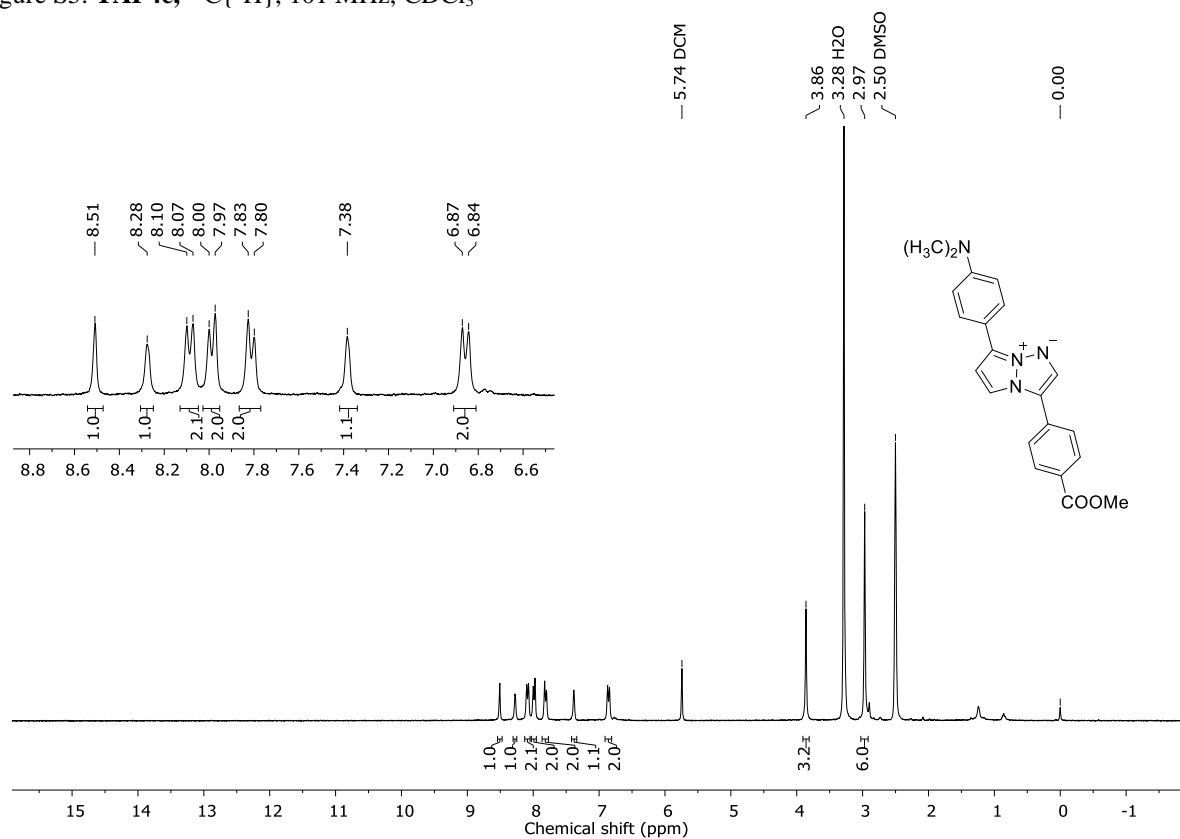

Figure S6. TAP4d,  $^1\text{H}$ , 300 MHz, DMSO-*d*<sub>6</sub>

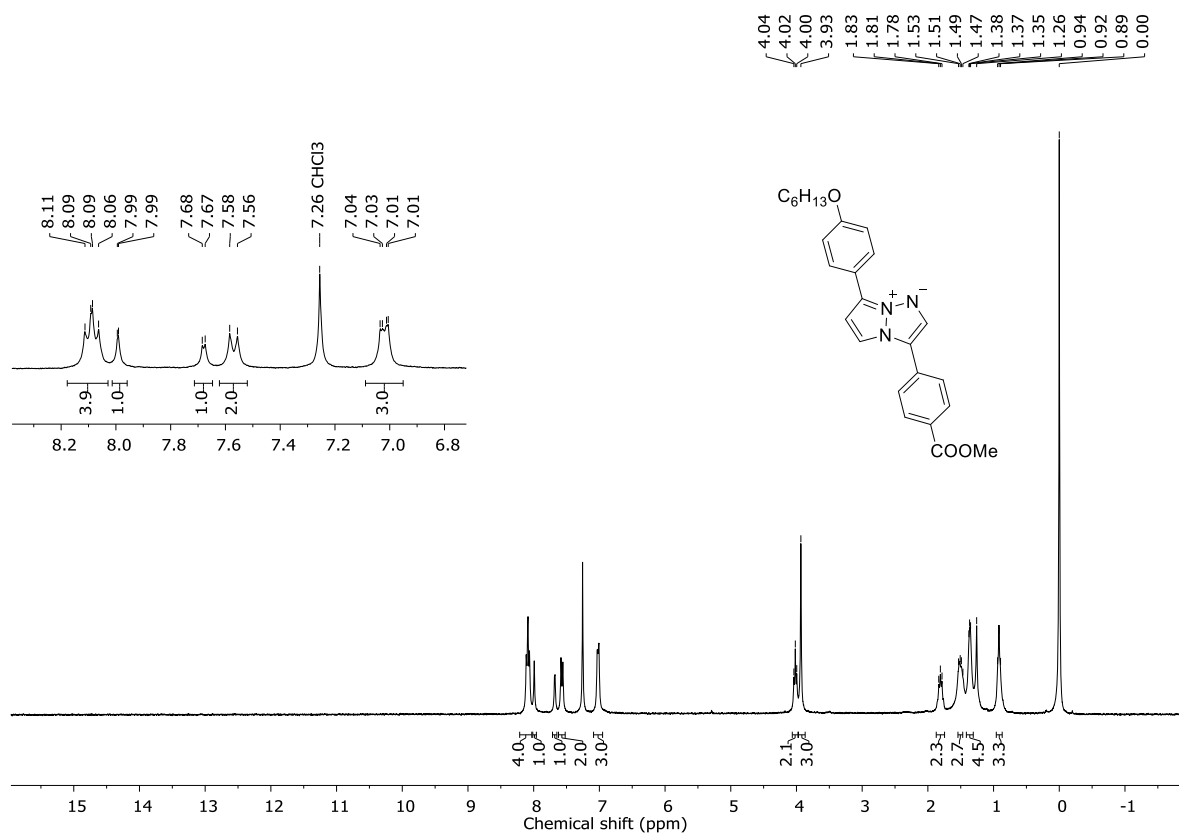

Figure S7. TAP4e, <sup>1</sup>H, 300 MHz, CDCl<sub>3</sub>

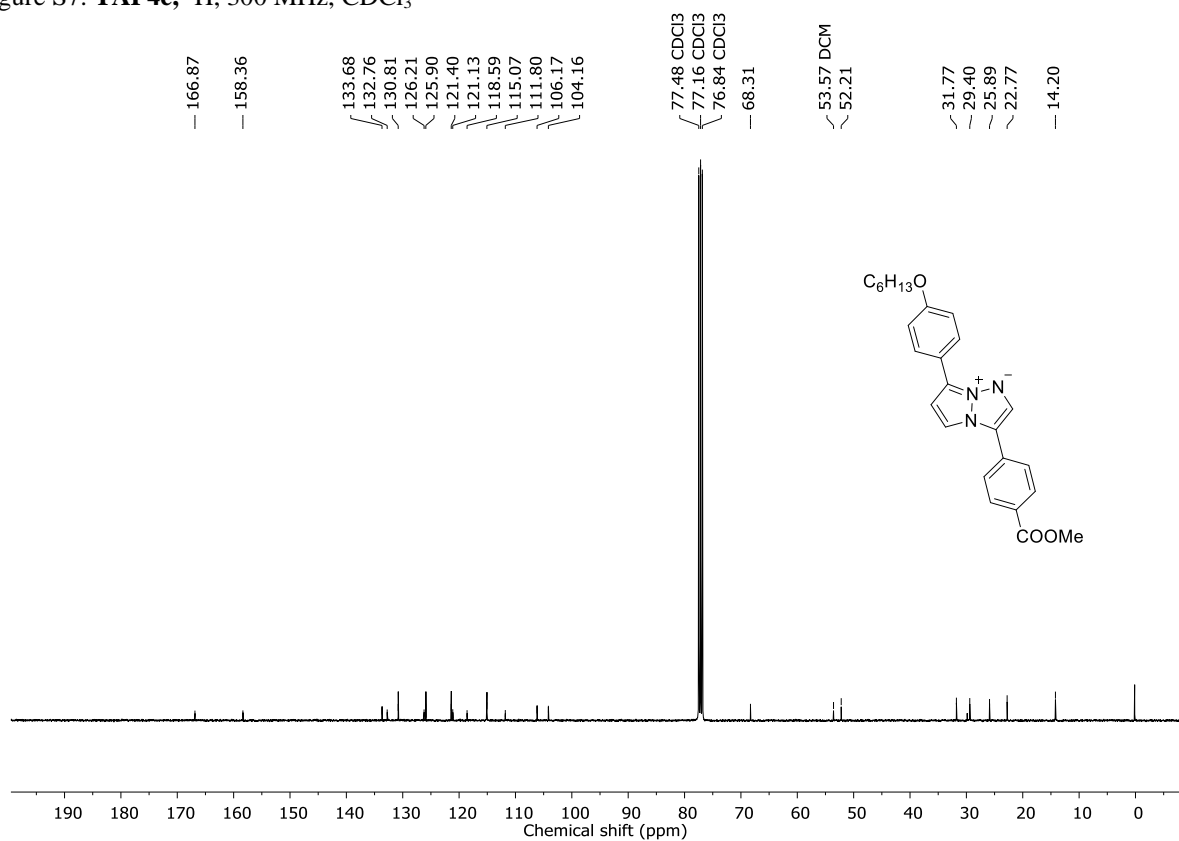

Figure S8. TAP4e, <sup>13</sup>C{<sup>1</sup>H}, 101 MHz, CDCl<sub>3</sub>

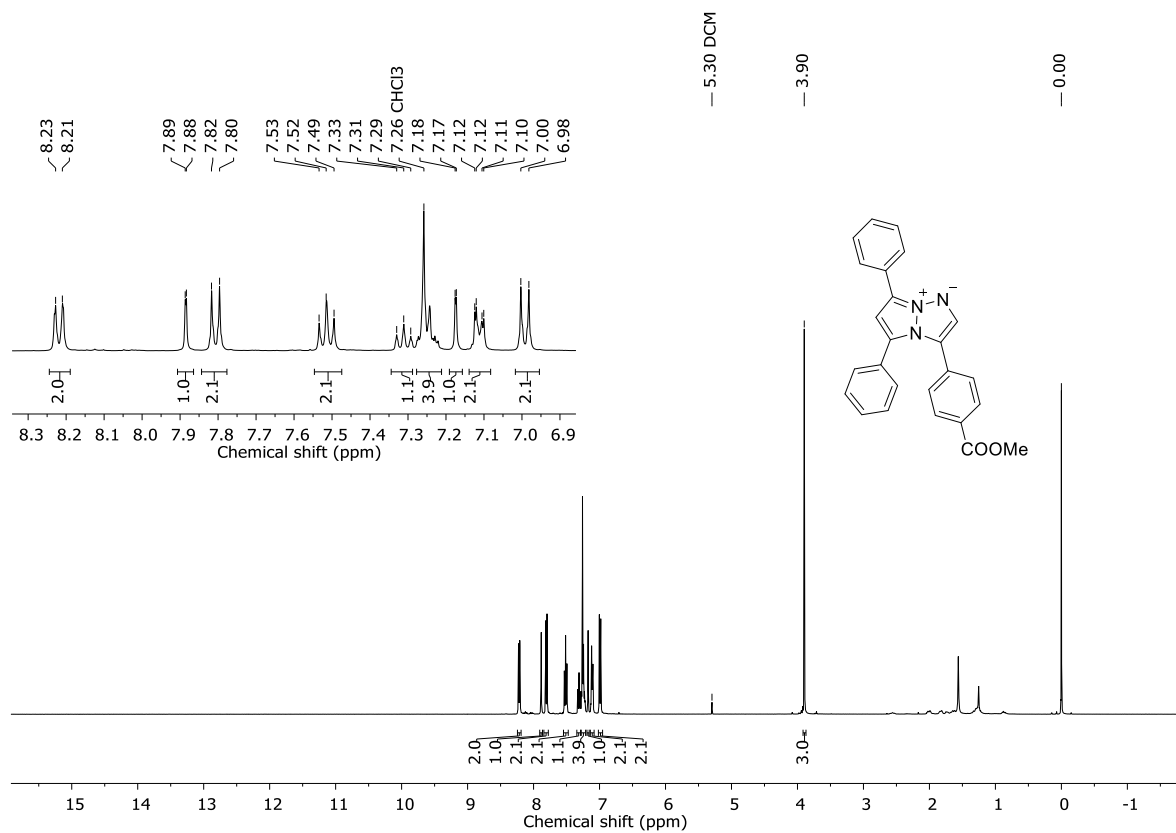

Figure S9. **TAP5a**, <sup>1</sup>H, 400 MHz, CDCl<sub>3</sub>

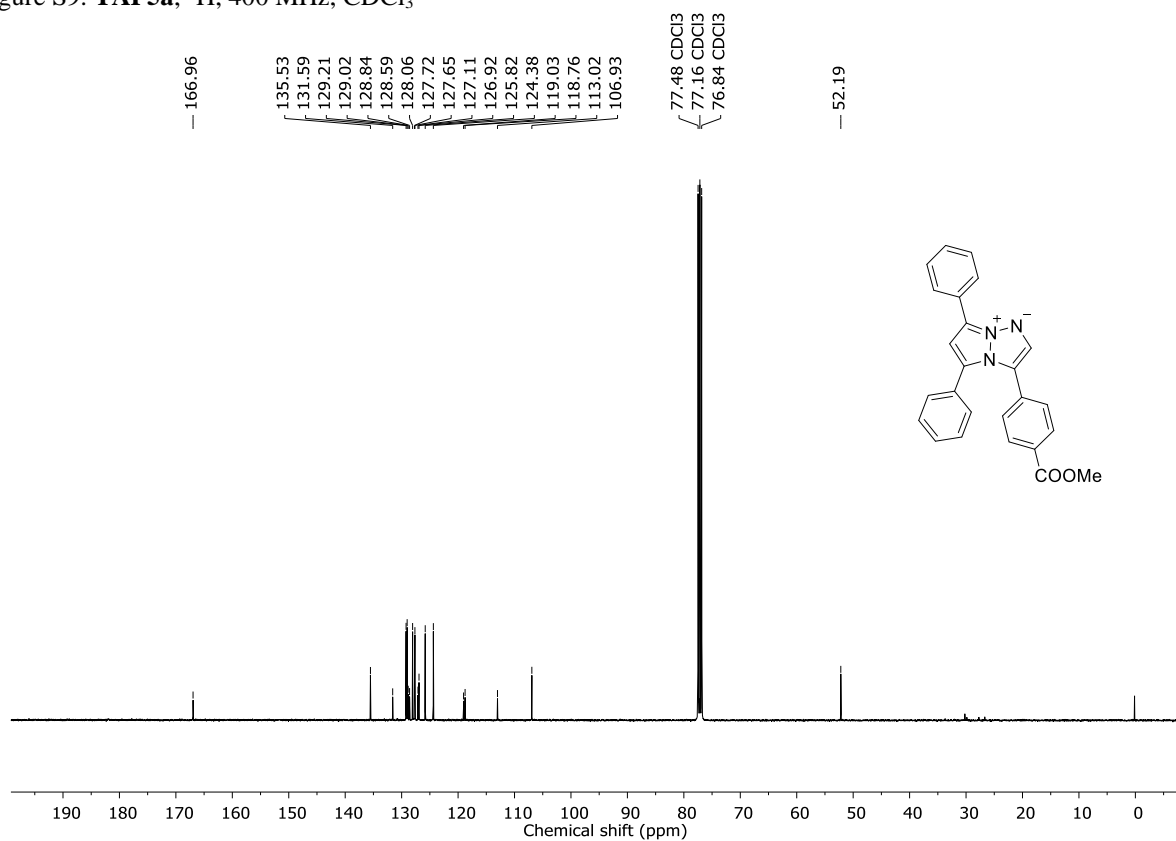

Figure S10. **TAP5a**, <sup>13</sup>C{<sup>1</sup>H}, 101 MHz, CDCl<sub>3</sub>

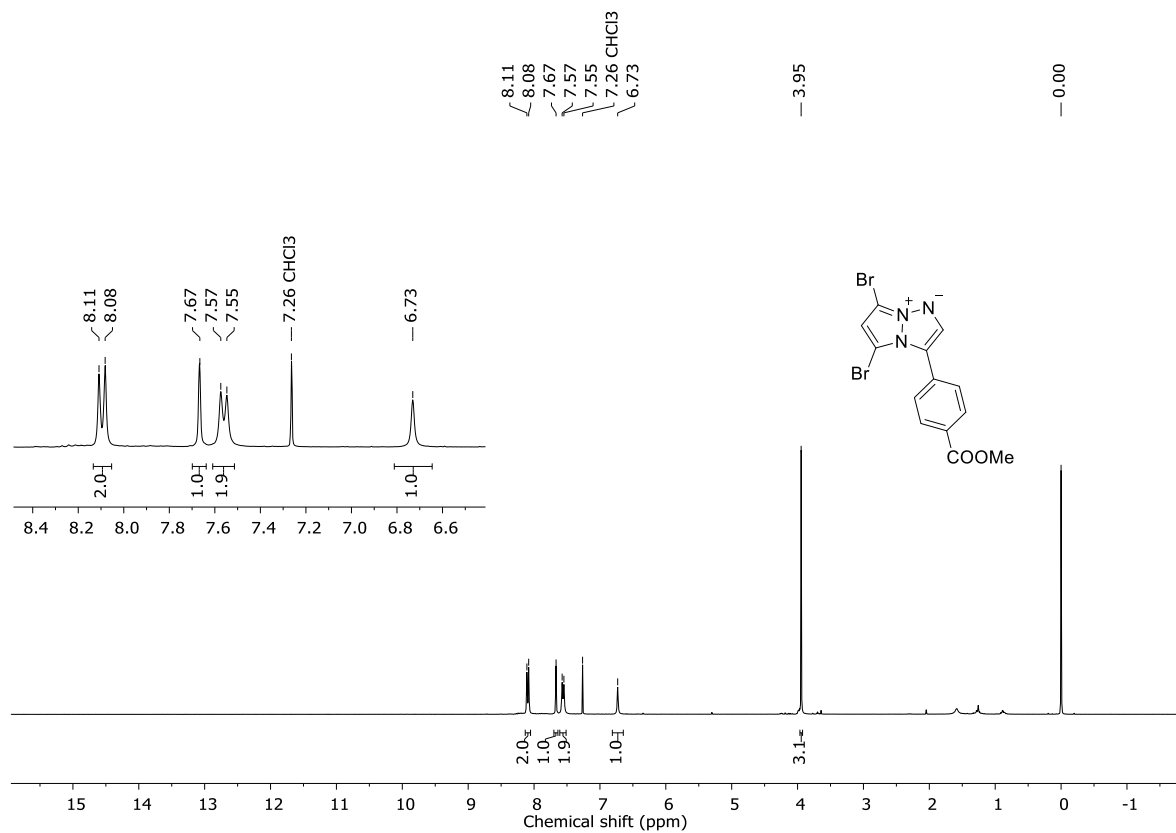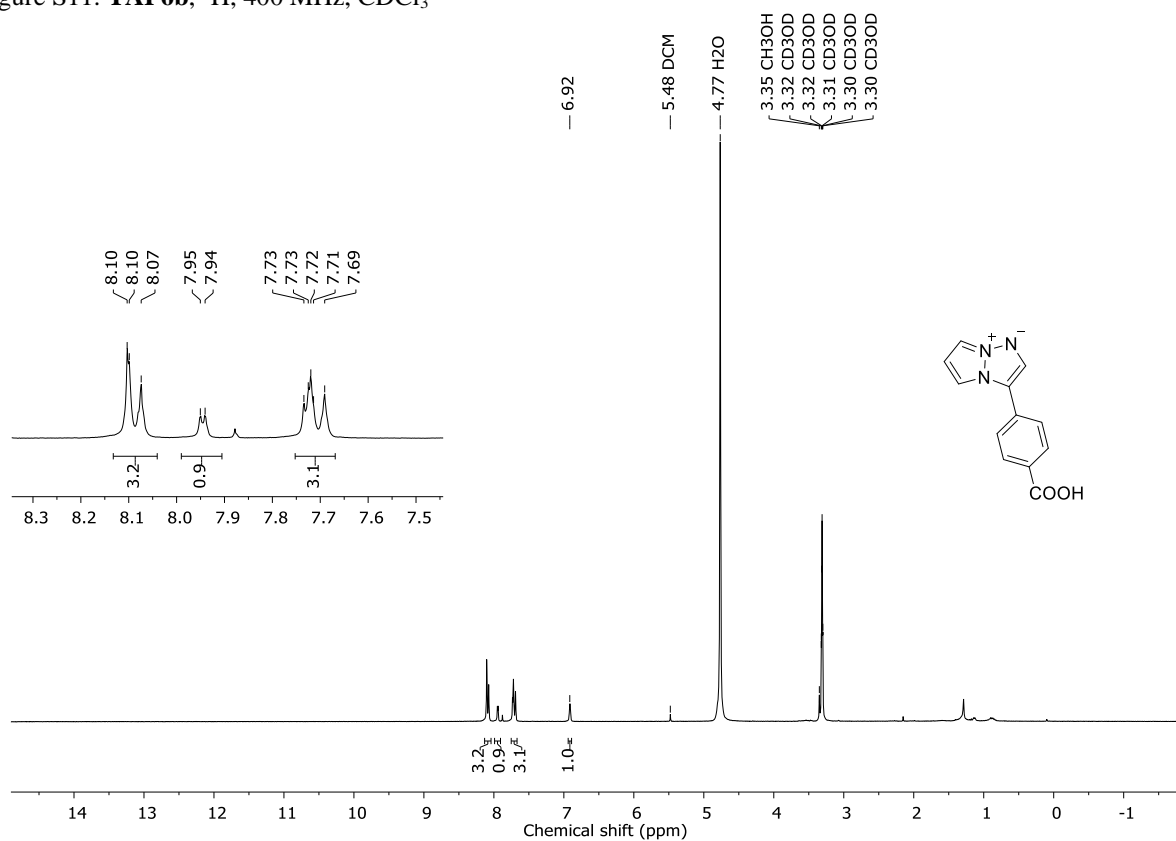

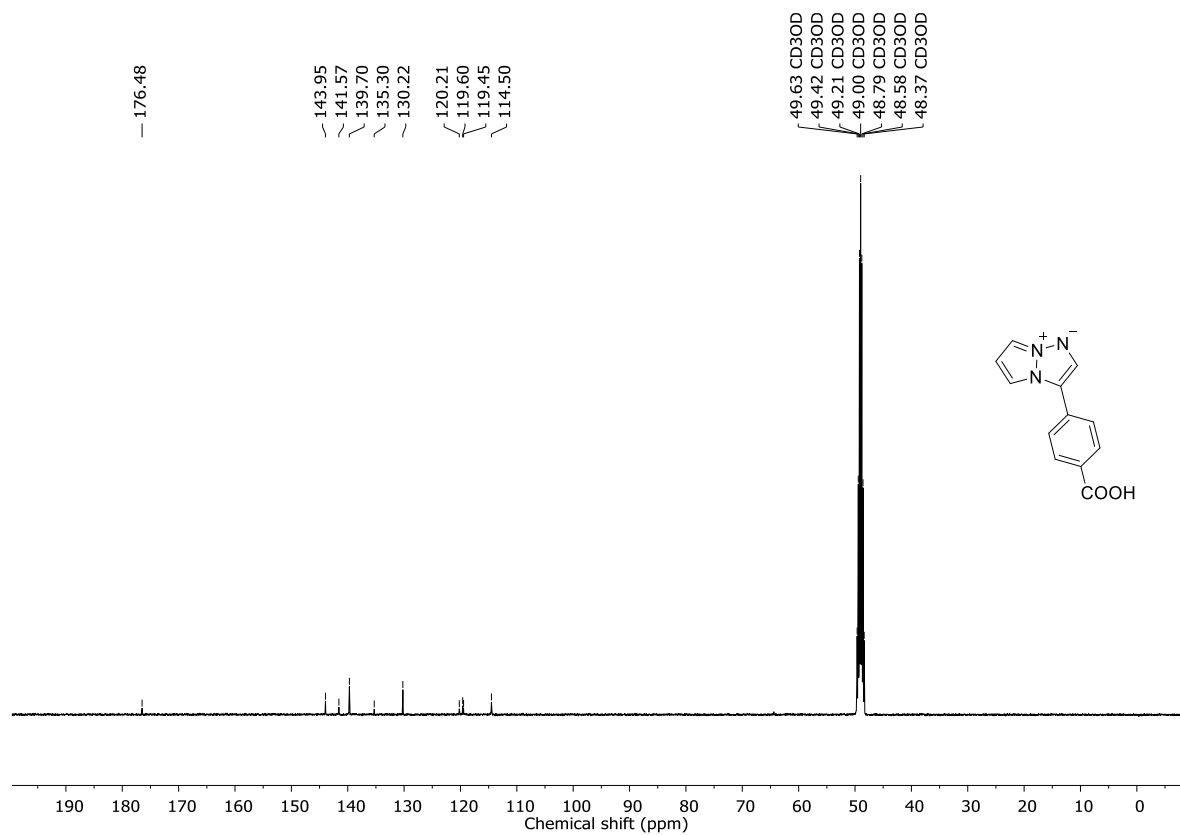

Figure S13. **TAP7**,  $^{13}\text{C}\{^1\text{H}\}$ , 101 MHz,  $\text{CD}_3\text{OD}$

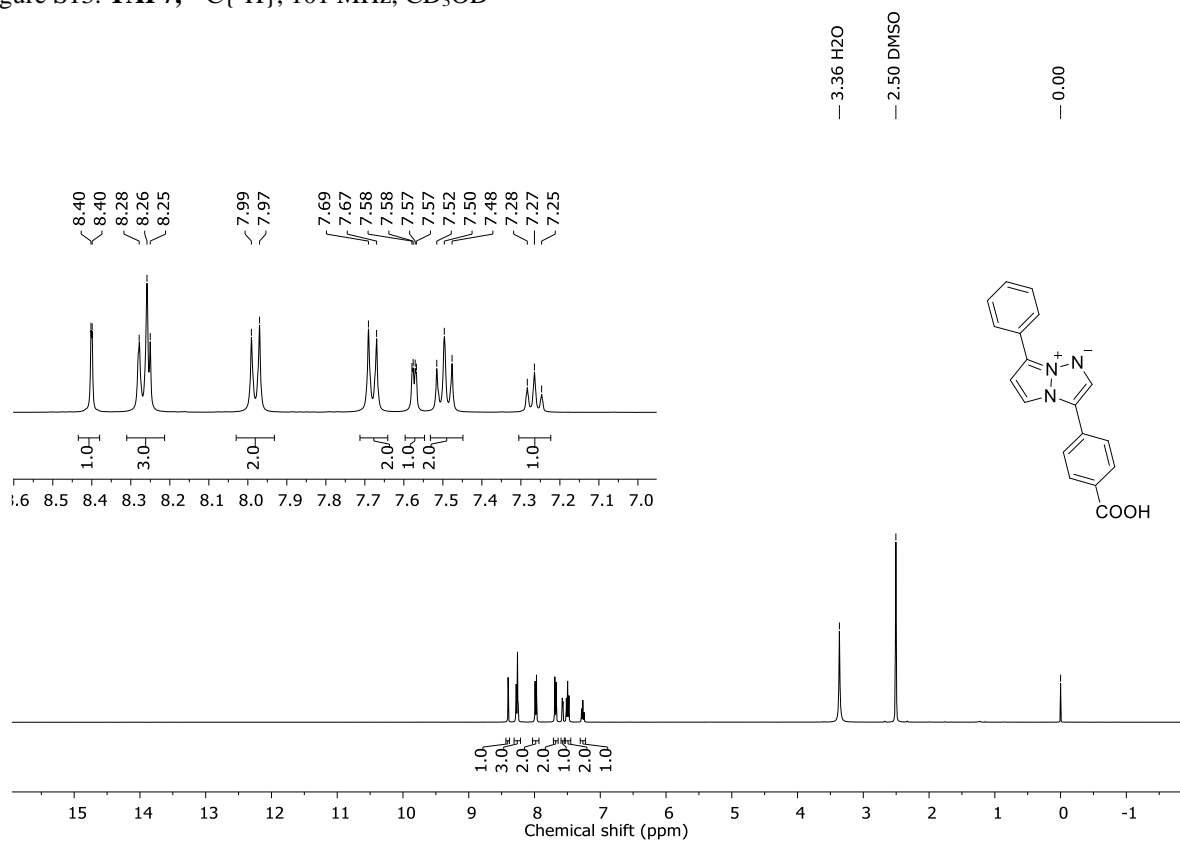

Figure S14. **TAP8**,  $^1\text{H}$ , 400 MHz,  $\text{DMSO}-d_6$



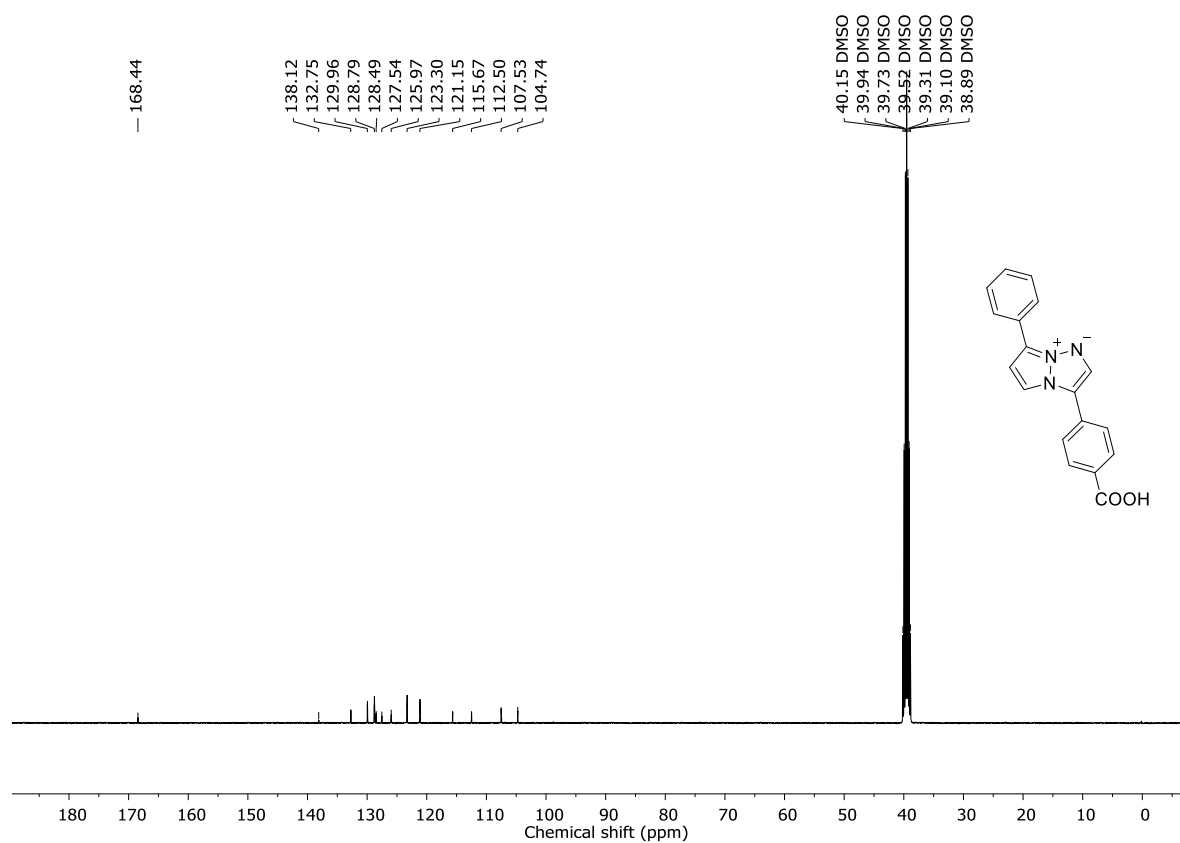

Figure S15. **TAP8**, <sup>13</sup>C{<sup>1</sup>H}, 101 MHz, DMSO-*d*<sub>6</sub>

## 2D NMR spectra

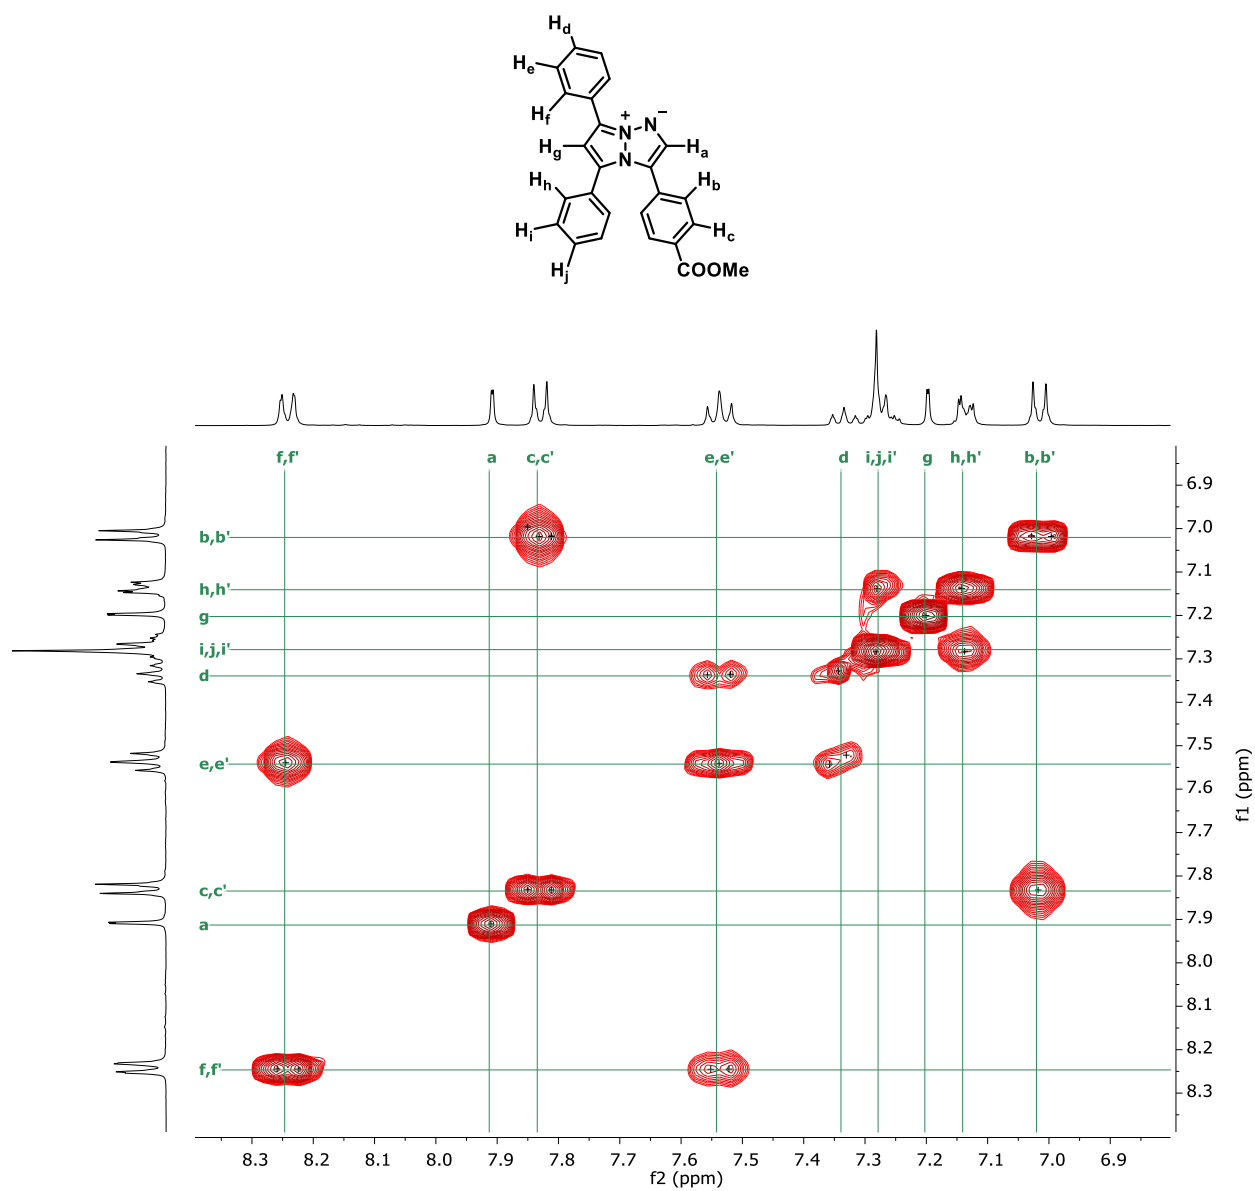

Figure S16. Structure and  $^1\text{H}$ - $^1\text{H}$  COSY NMR spectrum (400 MHz,  $\text{CDCl}_3$ ) of **TAP5a**.

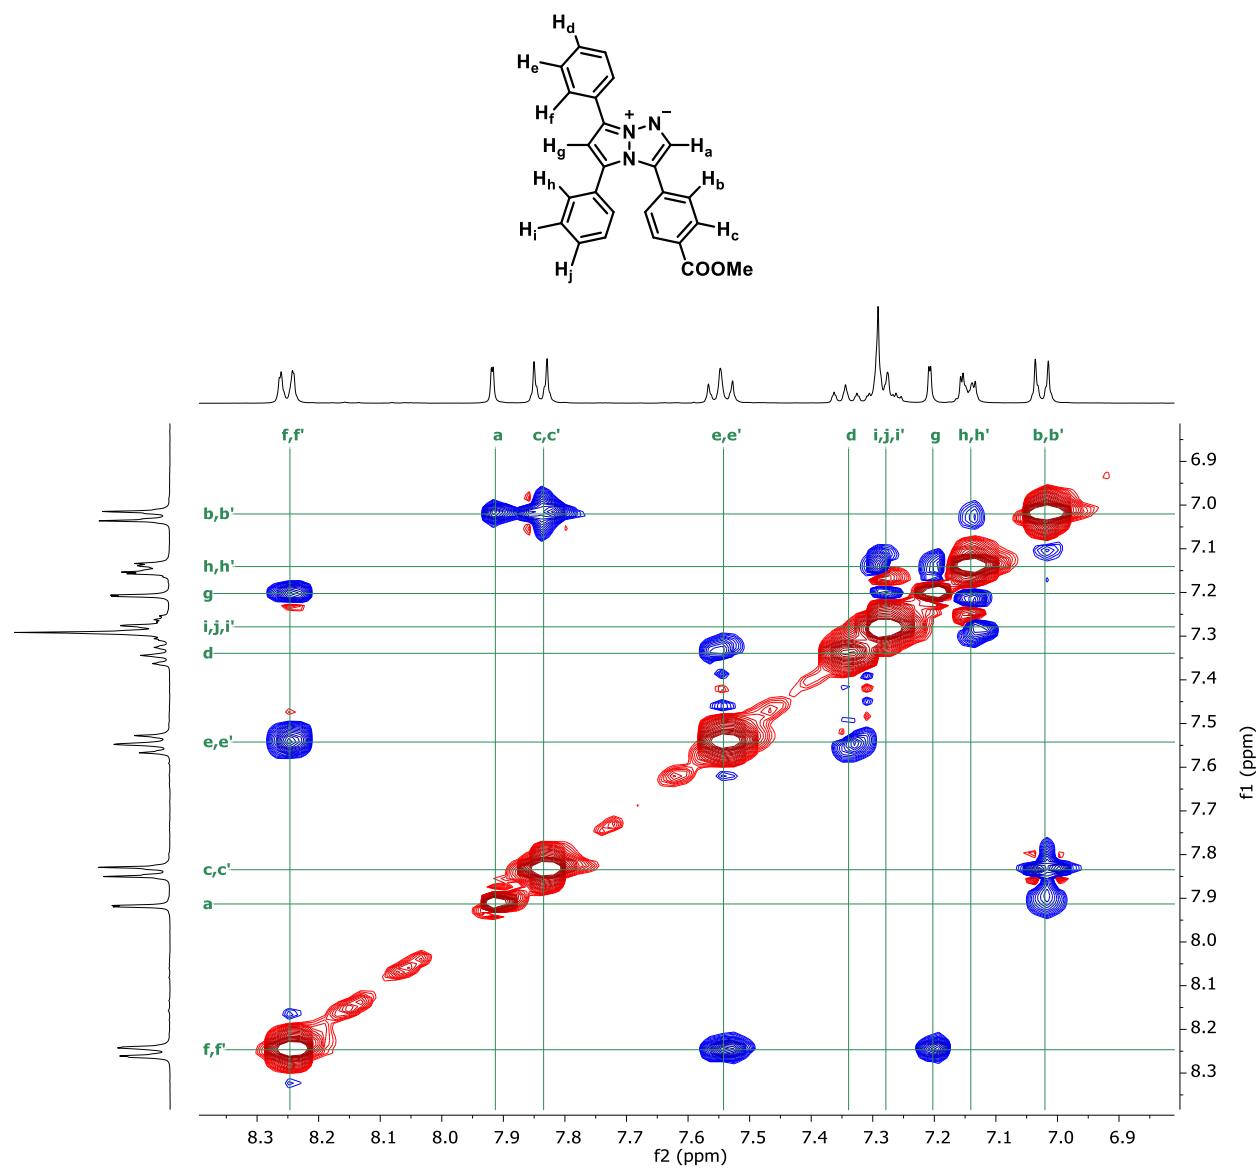

Figure S17. Structure and  $^1\text{H}$ - $^1\text{H}$  NOESY NMR spectrum (400 MHz,  $\text{CDCl}_3$ ) of **TAP5a**.

## Crystal structure of TAP4a

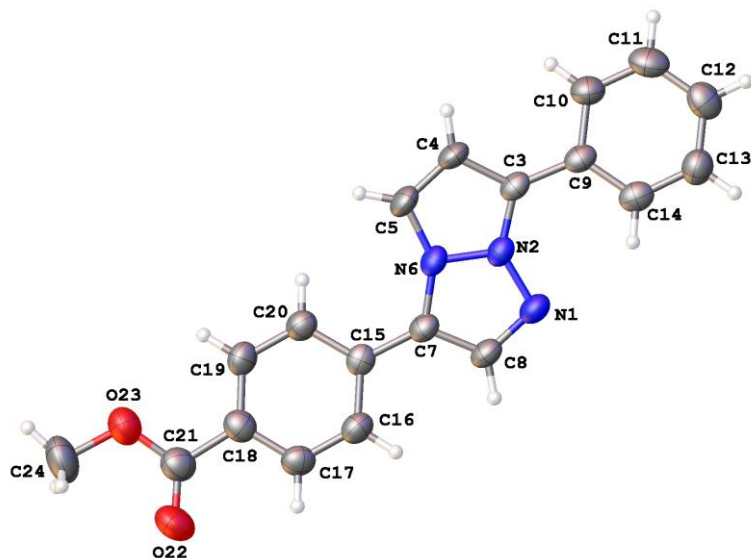

Figure S18. Crystal structure of **TAP4a**. Thermal ellipsoids are drawn at the 50% probability level.
